# Supplementary material for: Association of growth hormone receptor gene variant with longevity in men is due to amelioration of increased mortality risk from hypertension
Source: PubMed Central journal article supplement (PMC8221335; doi:10.18632/aging.203133), 2021-06-01
Supplement: aging-13-203133-s003.pdf [file aging-13-203133-s003.pdf]

## SUPPLEMENTARY TABLES

**Supplementary Table 1. The SNPs genotyped in *GHR* and the minor allele frequency of each in control American men of Japanese ancestry in the Kuakini Honolulu Heart Program, and of Japanese subjects in the dbSNP database.**

| SNP               | HHP  | dbSNP |
|-------------------|------|-------|
| <i>rs4130113*</i> | 0.40 | 0.48  |
| <i>rs9292853</i>  | 0.20 | 0.22  |
| <i>rs12187996</i> | 0.39 | 0.34  |
| <i>rs62373002</i> | 0.39 | 0.30  |
| <i>rs6873545</i>  | 0.14 | 0.13  |
| <i>rs4866931</i>  | 0.04 | 0.10  |
| <i>rs4410646</i>  | 0.41 | 0.42  |
| <i>rs4530764</i>  | 0.04 | 0.08  |
| <i>rs2972781</i>  | 0.41 | 0.48  |
| <i>rs12233949</i> | 0.33 | 0.31  |
| <i>rs3733838</i>  | 0.18 | 0.18  |
| <i>rs6451620</i>  | 0.43 | 0.45  |
| <i>rs6859653</i>  | 0.06 | 0.11  |

\*Denotes the SNP with longevity using a heterozygote disadvantage model.

**Supplementary Table 2. Each *GHR* SNP tested in the case-control study, and Bonferroni corrected *p* values for association with longevity.**

| Gene       | SNP ID            | <i>p</i> -value |
|------------|-------------------|-----------------|
| <i>GHR</i> | <i>rs4130113</i>  | 0.015*          |
| <i>GHR</i> | <i>rs9292853</i>  | 0.052           |
| <i>GHR</i> | <i>rs12187996</i> | 0.076           |
| <i>GHR</i> | <i>rs62373002</i> | 0.076           |
| <i>GHR</i> | <i>rs6873545</i>  | 0.11            |
| <i>GHR</i> | <i>rs4866931</i>  | 0.22            |
| <i>GHR</i> | <i>rs4410646</i>  | 0.28            |
| <i>GHR</i> | <i>rs4530764</i>  | 0.29            |
| <i>GHR</i> | <i>rs2972781</i>  | 0.45            |
| <i>GHR</i> | <i>rs12233949</i> | 0.456           |
| <i>GHR</i> | <i>rs3733838</i>  | 0.54            |
| <i>GHR</i> | <i>rs6451620</i>  | 0.72            |
| <i>GHR</i> | <i>rs6859653</i>  | 0.996           |

Probability (*p*) is based on heterozygote disadvantage model.

\*The *p* values were obtained after Bonferroni correction for multiple testing.

**Supplementary Table 3. The effect of *GHR* SNP *rs4130113* on mortality in the whole cohort for different genetic models by two Cox models.**

| Cox model | Genetic model              | Relative risk    | <i>p</i> |
|-----------|----------------------------|------------------|----------|
| 1         | <i>AG</i> vs. <i>AA/GG</i> | 1.07 (1.00-1.14) | 0.042    |
| 2         | <i>AG</i> vs. <i>AA/GG</i> | 1.06 (0.99-1.14) | 0.10     |
| 1         | <i>AA</i> vs. <i>AG/GG</i> | 0.97 (0.90-1.04) | 0.38     |
| 2         | <i>AA</i> vs. <i>AG/GG</i> | 0.99 (0.92-1.07) | 0.74     |
| 1         | <i>GG</i> vs. <i>AA/AG</i> | 0.93 (0.85-1.02) | 0.12     |
| 2         | <i>GG</i> vs. <i>AA/AG</i> | 0.92 (0.83-1.01) | 0.086    |

Model 1: adjusted for age.

Model 2: adjusted for age, BMI, glucose, smoking (pack years), PAI, alcohol intake, depression, stroke, CHD, diabetes, cancer and hypertension. The *p* values shown were obtained after correction for multiple testing by the Bonferroni method.

**Supplementary Table 4. Modifications to transcription factor binding by *rs4130113*.**

| SNP              | Transcription factor | Effect of major allele | Biological pathway(s)            | Tissue                                                                 |
|------------------|----------------------|------------------------|----------------------------------|------------------------------------------------------------------------|
| <i>rs4130113</i> | E2A_3 (TCF3)         | reduce                 | lymphopoiesis                    | All                                                                    |
|                  | MYF_1 (MYOD)         | reduce                 | muscle cell differentiation      | Skeletal muscle                                                        |
|                  | NRSF (REST)          | reduce                 | oncogene or a tumor suppressor   | Undifferentiated neuronal progenitor cells. Low levels in many tissues |
|                  | TAL1                 | increase               | erythroid differentiation        | Hematopoietic                                                          |
|                  | TCF12                | reduce                 | lineage-specific differentiation | Skeletal muscle, hematopoietic, skin                                   |

**Supplementary Table 5. Genetic features in *GHR*.**

| Feature             | Location (hg19)       | Characteristic                 |
|---------------------|-----------------------|--------------------------------|
| <i>GHR</i>          | 42,423,877–42,721,980 | Gene, variant 1                |
| Super enhancer      | 42,421,467–42,633,445 | Super enhancer, adipose tissue |
| <i>rs4130113</i>    | 42,514,651            | Longevity SNP, this study      |
| <i>LOC107963949</i> | 42,546,421–42,550,233 | Downstream promoter*           |
| <i>rs10941580</i>   | 42,580,021            | ieQTL and sQTL                 |

The table shows the location of the gene *GHR*, a super-enhancer described in adipose tissue, the longevity SNP *rs4130113* used in the present study, a downstream promoter, and an open chromatin feature in the gene, *GHR*. SNP *rs10941580* is predicted to be both an ieQTL and an sQTL for *GHR*. An NMD transcript variant is a variant in a transcript that is the target of non-sense mediated transcript decay (NMD; SO:0001621). An ieQTL is a *cis*-regulatory element that is predicted to influence the expression levels of a nearby gene [11]. sQTLs (splicing QTLs) are quantitative trait loci that regulate alternative splicing of pre-mRNA [13].

\*The downstream promoter represents regulatory module B of the growth hormone receptor gene. It encompasses the downstream promoters for alternate 5' end transcript variants V1, V4, V7 and V8. This sequence includes hepatocyte nuclear factor 4 $\alpha$  r [12] recognition sites and GAGA sites, which recognize sequence-specific transcription factors that positively and negatively regulate gene expression. *GHRv1* is the major form and is liver specific.

**Supplementary Table 6. Influence of *rs1094150* on exon usage in *GHR*.**

| <b>SNP</b>        | <b>Intron ID</b> | <b><i>p</i></b> | <b>NES</b> | <b>Tissue</b>                       |
|-------------------|------------------|-----------------|------------|-------------------------------------|
| <i>rs10941580</i> | clu_37892        | 3.70E-11        | 0.45       | Adipose tissue – visceral (Omentum) |
|                   | clu_34535        | 7.30E-11        | 0.37       | Muscle – skeletal                   |
|                   | clu_39029        | 7.40E-09        | 0.36       | Adipose tissue – subcutaneous       |
|                   | clu_40148        | 1.00E-07        | -0.38      | Nerve –tibial                       |
|                   | clu_41545        | 0.0000049       | -0.33      | Thyroid                             |
|                   | clu_39450        | 0.000018        | 0.33       | Breast – mammary tissue             |

The Table shows the predicted exon usage in the tissues described. NES refers to the normalized effect size. All data are from GTEx [19].
